# Supplementary material for: Persistence of the Exotic Mirid Nesidiocoris tenuis (Hemiptera: Miridae) in South Texas
Source: MDPI journal article supplement (doi:10.3390/insects12080715), 2021-08-10
Supplement: s1 [file s1]

Supplementary Materials: Samples mtCOI sequences and BLASTs scores

| Sample ID                       | Sequence                                                                                                                                                                                                                                                                                                                                                                                                                                                                                                                                                              | GenBank                                 | Seq ID   | Identity | E-value |
|---------------------------------|-----------------------------------------------------------------------------------------------------------------------------------------------------------------------------------------------------------------------------------------------------------------------------------------------------------------------------------------------------------------------------------------------------------------------------------------------------------------------------------------------------------------------------------------------------------------------|-----------------------------------------|----------|----------|---------|
| <i>Bactericera cockerelli</i> 1 | AGCCAGTCTGATGAGATAGGGTCTCCTCCTCCGGCA<br>GGATCAAAGAAGGAAGTATTTAGATTACGGTCAGT<br>TAAAAGAAATGTGATAGCTCCTGCTAGAACAGGAAG<br>AGCTAGCAAAAGAAAAATTGCAGTGATTAATACAG<br>ATCACACAAATAGTGGTATTTTTCTAATCTACATAT<br>ACATCTTCGTATATTAATAATTGTTGAATAAAATTG<br>ATTGCTCCTAAAATAGAAGAAATTCAGCAAGATGT<br>AGTGAAAAATAACTGTATCTACAGAGTATCCACTA<br>TGAAAAATAGAATTGGATAAAGGAGGATATACAGT<br>TCAACCTGTCCTACACCTTGATCAATTAATCTACTT<br>ATAATTAACAGATACAAAGATGGAATTAGGAGTCA<br>AAATCTTATGTTATTTATTCGGGGGAAATGCAAATT<br>TTTTTTTTTACACTAGGAAAAAGACACGGTTTTTTTT<br>TTGTGGGGGGGGGAACCTAATAAAATTTCTGT   | gi 102114<br>3420 gb <br>KU501214<br>.1 | KU501214 | 97.356   | 0       |
| <i>Bactericera cockerelli</i> 2 | GCGGTATGATGAGATAGGGTCTCCTCCTCCGGCAG<br>GATCAAAGAAGGAAGTATTTAGATTACGGTCAGTT<br>AAAAGACTGTGATAGCTCCTGCTAGAACAGGAAGA<br>GCTAGCAAAAGCTAAATTGCAGTGATTAATACAGAT<br>CACACAAATAGTGGTATTTTTCTAATCTACATATAC<br>ATCTTCGTATATCAATAATTGTTGAATAAAATTGAT<br>TGCTCCTAAAATAGAAGAAATTCAGCAAGATGTAG<br>TGAAAAATAGCTGTATCTACAGAGTATCCACTATG<br>AAAAATAGAATTGGATAAAGGAGGATATACAGTTC<br>AACCTGTCCTACACCTTGATCAATTAATCTACTTAT<br>AATTAACAGATACAAAGATGGAATTAGGAGTCAAA<br>ATCTTATGTTATTTATTCGGGGGAAATGCTTTTTTTTT<br>TTTTGAGAAGAGAGGAAAAAACCTTTTTTTTTTTTTG<br>GGGGGGAAACCGATTATTATTTTCTTTTGGTAC | gi 102114<br>3420 gb <br>KU501214<br>.1 | KU501214 | 97.115   | 0       |
| <i>Bactericera cockerelli</i> 3 | ATTTTTTTATGAAAATAGGGTCTCCTCCTCCGGCAG<br>GATCAAAGAAGGAAGTATTTAGATTACGGTCAGTT<br>AAAAGTATTGTGATAGCTCCTGCTAGAACAGGAAG<br>AGCTAGCAAAAGTAAAAATTGCAGTGATTAATACAG<br>ATCACACAAATAGTGGTATTTTTCTAATCTACATAT<br>ACATCTTCGTATATTAATAATTGTTGAATAAAATTG<br>ATTGCTCCTAAAATAGAAGAAATTCAGCAAGATGT<br>AGTGAAAAATAGCTGTATCTACAGAGTATCCACTA<br>TGAAAAATAGAATTGGATAAAGGAGGATATACAGT<br>TCAACCTGTCCTACACCTTGATCAATTAATCTACTT<br>ATAATTAACAGATACAAAGATGGAATTAGGAGTCA<br>AAATCTTATATTATTTATTCGTGGAAATGCAATTTTT<br>TTTTT                                                                      | gi 102114<br>3420 gb <br>KU501214<br>.1 | KU501214 | 98.551   | 0       |

|                                    |                                                                                                                                                                                                                                                                                                                                                                                                                                                                                                                                              |                                                     |        |   |
|------------------------------------|----------------------------------------------------------------------------------------------------------------------------------------------------------------------------------------------------------------------------------------------------------------------------------------------------------------------------------------------------------------------------------------------------------------------------------------------------------------------------------------------------------------------------------------------|-----------------------------------------------------|--------|---|
| <i>Bactericera cockerelli</i> i 4  | GKRGSGGCTGATGAKATAGGGTCTCCTCCTCCGGCA<br>GGATCAAAGAAGGAAGTATTTAGATTACGGTCAGT<br>TAAAAGTATTGTGATAGCTCCTGCTAGAACAGGAA<br>GAGCTAGCAAAAGTAAAATTGCAGTGATTAATACA<br>GATCACACAAATAGTGGTATTTTTCTAATCTACATA<br>TACATCTTCKTATATTAATAATTGTTGTAATAAAATT<br>GATTGCTCCTAAAATAGAAGAAATTCCAGCAAGATG<br>TAGTGAAAAATAACTGTATCTACAGAGTATCCACT<br>ATGAAAAATAGAATTGGATAAAGGAGGATATACAG<br>TTCAACCTGTCCCTACACCTTGATCAATTAATCTACT<br>TATAATTAACAGATACAAAGATGGAATTAGGAGTC<br>AAAATCTTATATTATTTATTCGTGGAAATTTTTTTTT<br>TT                                              | gi 102114 KU501214<br>3420 gb  .1<br>KU501214<br>.1 | 98.526 | 0 |
| <i>Nesidiocoris tenuis</i> Spain_1 | TGTGAAAAGGGGTATCCACCATAAATAAATTTACAA<br>TTTATCGCCTAAATTAATTCAGCCACCTTTTCATGAA<br>CAAATGATTATTATCAACCAATCACAAAGACATTGG<br>TACTTTATACTTCATATTAGGTATATGAGCAGGCAT<br>GTTAGGAACATCTATAAGATGGATTATTCGAATTGA<br>ATTAGGAATACCCGGGTCAATTTATCGGAAATGATCA<br>GACATATAATGTAATAGTAACTGCTCACGCATTTGT<br>AATAATTTTTTTCATAGTTATACCTATTATAATCGGA<br>GGGTTTCGGAAATTGATTAGTTCTCTAATGATTGGG<br>GCCCCTGACATAGCTTTCCCTCGAATRAATAATATA<br>AGATTTTGACTTCTACCCCTTCACTAACTCTTCTAA<br>CTATAAGAAGTATAGTAGAAAGA                                                           | gi 385252 JQ806057.<br>529 gb JQ 1<br>806057.1      | 99.291 | 0 |
| <i>Nesidiocoris tenuis</i> Spain_2 | TGTGAAAAGGGGTATCCACCATAAATAAATTTACAA<br>TTTATCGCCTAAATTAATTCAGCCACCTTTTCATGAA<br>CAAATGATTATTATCAACCAATCACAAAGACATTGG<br>TACTTTATACTTCATATTAGGTATATGAGCAGGCAT<br>GTTAGGAACATCTATAAGATGGATTATTCGAATTGA<br>ATTAGGAATACCCGGRTCAATTTATCGGAAATGATCA<br>GACATATAATGTAATAGTAACTGCTCACGCATTTGT<br>AATAATTTTTTTCATAGTTATACCTATTATAATCGGA<br>GGGTTTCGGGAAATTGATTAGTTCTCTAATGATTGG<br>GGCCCCTGACATAGCTTTCCCTCGAATAAATAATAT<br>AAGATTTTGACTTCTACCCCTTCACTAACTCTTCTA<br>ACTATAAGAAGTATAGTAGAAAGAGGGGCAGGGA<br>CAGGATGAACAGTATACCCTCCTCTGTCGGGGAATC<br>TAA | gi 385252 JQ806057.<br>529 gb JQ 1<br>806057.1      | 98.943 | 0 |
| <i>Nesidiocoris tenuis</i> Spain_3 | TGTGAAAAGGGGTATCCACCATAAATAAATTTACAA<br>TTTATCGCCTAAATTAATTCAGCCACCTTTTCATGAA<br>CAAATGATTATTATCAACCAATCACAAAGACATTGG<br>TACTTTATACTTCATATTAGGTATATGAGCAGGCAT<br>GTTAGGAACATCTATAAGATGGATTATTCGAATTGA<br>ATTAGGAATACCCGGGTCAATTTATCGGAAATGATCA<br>GACATATAATGTAATAGTAACTGCTCACGCATTTGT<br>AATAATTTTTTTCATAGTTATACCTATTATAATCGGA<br>GGGTTTCGGGAAATTGATTAGTTCTCTAATGATTGG<br>GCCCCTGACATAGCTTYSCTCGAATAAATAATATAA<br>GATTTTGACTTCTACCCCTTCACTAACTCTTCTAAC<br>TATAARAAGTATAGTAGAAAGAGGGGCAGGGACA<br>GGATGAACA                                   | gi 385252 JQ806057.<br>529 gb JQ 1<br>806057.1      | 98.874 | 0 |

|                                    |                                                                                                                                                                                                                                                                                                                                                                                                                                                                                                                        |                                                |        |   |
|------------------------------------|------------------------------------------------------------------------------------------------------------------------------------------------------------------------------------------------------------------------------------------------------------------------------------------------------------------------------------------------------------------------------------------------------------------------------------------------------------------------------------------------------------------------|------------------------------------------------|--------|---|
| <i>Nesidiocoris tenuis</i> Spain_4 | GTGAAAAGGGGTATCCACCATAAATAAATTTACAAT<br>TTATCGCCTAAATTAATTCAGCCACCTTTTCATGAAC<br>AAATGATTATTATCAACCAATCACAAAGACATTGGT<br>ACTTTATACTTCATATTAGGTATATGAGCAGGCATG<br>TTAGGAACATCTATAAGATGGATTATTCGAATTGAA<br>TTAGGAATACCCGGGTCAATTCGGAATGATCAG<br>ACATATAATGTAATAGTAAGTCTCACGCATTTGTA<br>ATAATTTTTTTCATAGTTATACCTATTATAATCGGAG<br>GGTTCGGAATGATTAGTTCCTCTAATGATTGGGG<br>CCCCTGACATAGCTTTCCCTCGAATAAATAATATAA<br>GATTTTGACTTCTACCCCTTCACTAACTCTTCTAAC<br>TATAAGAAGTATAGTAGAAAGAGGGGCAGGGACA<br>GGATGAACAGTATACCTCCTCTGTCGGG | gi 385252 JQ806057.<br>529 gb JQ 1<br>806057.1 | 99.353 | 0 |
| <i>Nesidiocoris tenuis</i> Texas_1 | TGTGAAAAGGGGTATCCACCATAAATAAATTTACAA<br>TTTATCGCCTAAATTAATTCAGCCACCTTTTCATGAA<br>CAAATGATTATTATCAACCAATCACAAAGACATTGG<br>TACTTTATACTTCATATTAGGTATATGAGCAGGCAT<br>GTTAGGAACATCTATAAGATGGATTATTCGAATTGA<br>ATTAGGAATACCCGGGTCAATTCGGAATGATCA<br>GACATATAATGTAATAGTAAGTCTCACGCATTTGT<br>AATAATTTTTTTCATAGTTATACCTATTATAATCGGA<br>GGGTTTCGGAATGATTAGTTCCTCTAATGATTGGG<br>GCCCCGACATAGCTTTCCCTCGAATAAATAATATA<br>AGATTTTGACTTCTACCCCTTCACTAACTCTTCTAA<br>CTATAAGAAGTATAGTAGA                                                | gi 385252 JQ806057.<br>529 gb JQ 1<br>806057.1 | 99.523 | 0 |
| <i>Nesidiocoris tenuis</i> Texas_2 | TGTGAAAAGGGGTATCCACCATAAATAAATTTACAA<br>TTTATCGCCTAAATTAATTCAGCCACCTTTTCATGAA<br>CAAATGATTATTATCAACCAATCACAAAGACATTGG<br>TACTTTATACTTCATATTAGGTATATGAGCAGGCAT<br>GTTAGGAACATCTATAAGATGGATTATTCGAATTGA<br>ATTAGGAATACCCGGGTCAATTCGGAATGATCA<br>GACATATAATGTAATAGTAAGTCTCACGCATTTGT<br>AATAATTTTTTTCATAGTTATACCTATTATAATCGGA<br>GGGTTTCGGAATGATTAGTTCCTCTAATGATTGGG<br>GCCCCGACATAGCTTTCCCTCGAATAAATAATATA<br>AGATTTTGACTTCTACC                                                                                          | gi 385252 JQ806057.<br>529 gb JQ 1<br>806057.1 | 99.211 | 0 |
| <i>Nesidiocoris tenuis</i> Texas_3 | TGTGAAAAGGGGTATCCACCATAAATAAATTTACAA<br>TTTATCGCCTAAATTAATTCAGCCACCTTTTCATGAA<br>CAAATGATTATTATCAACCAATCACAAAGACATTGG<br>TACTTTATACTTCATATTAGGTATATGAGCAGGCAT<br>GTTAGGAACATCTATAAGATGGATTATTCGAATTGA<br>ATTAGGAATACCCGGGTCAATTCGGAATGATCA<br>GACATATAATGTAATAGTAAGTCTCACGCATTTGT<br>AATAATTTTTTTCATAGTTATACCTATTATAATCGGA<br>GGGTTTCGGAATGATTAGTTCCTCTAATGATTGGG<br>GCCCCGACATAGCTTTCCCTCGAATAAATAATATA<br>AGATTTTGACTTCTAC                                                                                           | gi 385252 JQ806057.<br>529 gb JQ 1<br>806057.1 | 99.472 | 0 |

|                                    |                                                                                                                                                                                                                                                                                                                                                                                                                                                                                                                                               |                                                |        |   |
|------------------------------------|-----------------------------------------------------------------------------------------------------------------------------------------------------------------------------------------------------------------------------------------------------------------------------------------------------------------------------------------------------------------------------------------------------------------------------------------------------------------------------------------------------------------------------------------------|------------------------------------------------|--------|---|
| <i>Nesidiocoris tenuis</i> Texas_4 | TGTGAAAAGGGGTATCCACCATAAATAAATTTACAA<br>TTTATCGCCTAAATTAATTCAGCCACCTTTTCATGAA<br>CAAATGATTATTATCAACCAATCACAAAGACATTGG<br>TACTTTATACTTCATATTAGGTATATGAGCAGGCAT<br>GTTAGGAACATCTATAAGATGGATTATTCGAATTGA<br>ATTAGGAATACCCGGGTCATTTATCGGAAATGATCA<br>GACATATAATGTAATAGTAACTGCTCACGCATTTGT<br>AATAATTTTTTTCATAGTTATACCTATTATAATCGGA<br>GGGTTCGGAAATTGATTAGTTCCTCTAATGATTGGG<br>GCCCCYGACATAGCTTTCCCTCGAATAAATAATATA<br>AGATTTTGACTTCTACCCCCTTCACTAACTCTTCTAA<br>CTATAAGAAGTATAGTAGAAAGAGGGGCAGGGAC<br>AGGATGAACAGTATACCCTCCTCTGTCGGGGAATCT<br>AAGA | gi 385252 JQ806057.<br>529 gb JQ 1<br>806057.1 | 99.156 | 0 |
|------------------------------------|-----------------------------------------------------------------------------------------------------------------------------------------------------------------------------------------------------------------------------------------------------------------------------------------------------------------------------------------------------------------------------------------------------------------------------------------------------------------------------------------------------------------------------------------------|------------------------------------------------|--------|---|

---
